# Supplementary material for: Modified alginate dressing with high thermal stability as a new separator for Li-ion batteries
Source: Royal Society of Chemistry journal article supplement (doi:10.1039/d0cc01729a), 2020-01-01
Supplement: d0cc01729a1.pdf [file d0cc01729a1.pdf]

## Electronic Supporting Information (ESI) for

# Modified alginate dressing with high thermal stability as a new separator for Li-ion batteries

Dongmei Dai<sup>a</sup>, Lifan Yang<sup>b</sup>, Shumin Zheng<sup>c</sup>, Jin Niu<sup>a</sup>, Zhi Sun<sup>c</sup>, Bao Wang<sup>c\*</sup>, Yafeng Yang<sup>c\*</sup>, Bao Li<sup>a\*</sup>

*a. Collaborative Innovation Center of Henan Province for Green Manufacturing of Fine Chemicals, Key Laboratory of Green Chemical Media and Reactions, Ministry of Education, School of Chemistry and Chemical Engineering, Henan Normal University, Xinxiang, Henan 453007, China. E-mail: libao@htu.edu.cn.*

*b. School of Chemistry, Sun Yat-Sen University, Guangzhou, Guangdong 510275, China.*

*c. State Key Laboratory of Biochemical Engineering, Institute of Process Engineering, Chinese Academy of Sciences, Beijing 100190, China. E-mail: baowang@ipe.ac.cn; yfyang@ipe.ac.cn.*

## Contents

|                                   |          |
|-----------------------------------|----------|
| <b>Experimental section</b> ..... | <b>2</b> |
| <b>Figure S1</b> .....            | <b>4</b> |
| <b>Figure S2</b> .....            | <b>5</b> |
| <b>Table S1</b> .....             | <b>6</b> |

## **Experimental section**

### **Modification of alginate dressing**

Alginate dressing pretreatment: Alginate Dressing (Biatain Alginate 3710, alginate/CMC ratio ~85/15) is a highly absorbent, fiber-free, non-adherent alginate dressing that forms a soft and protecting gel - ideal for highly exudating wounds [1] (Chemical structure see Figure S1). Alginate dressing soaked in anhydrous ethanol for 24 h, and then dried it in a vacuum oven at 50 °C for 6 h. The thickness of dry alginate dressing is ~450 μm and it decreased to ~400 μm after pretreatment with anhydrous ethanol.

Alginate dressing modification: First preparing the mixed ethanol solution of polyacrylic acid (Aladdin, MW 3000) and lithium monohydroxide (Aladdin, 98%), where the solution is saturated for LiOH at room temperature and weight ratio of PAA and LiOH is about 1.72:1. Then soaking the above-dried alginate dressing in the mixed solution for 6 h. Finally using filter paper to clean the mixed solution on the alginate dressing and dried it in a vacuum oven at 50 °C for 6 h.

For comparison, a 3-layer separator was selected as control sample (Celgard 2325 with a thickness of 25μm).

### **Tests for elemental analysis, thermal shrinkage, and adsorption/retention property**

The elemental content analysis to alginate dressing were carried out by inductively coupled plasma optical emission spectroscopy (ICP-OES, Agilent 730). Fibers of alginate dressing were firstly digested in concentrated sulfuric acid and nitric acid, and then the mixed solution was diluted with distilled water into a transparent solution. The target elements include Ca, Na and Ag.

Tests for thermal shrinkage were referred to the method in UL 2591-2009 Outline of Investigation for Battery Separators. Typically, alginate dressing was nipped by two smooth pieces of glass and then add a 50 psi pressure on it (~0.344MPa simulate the pressure that a separator was experienced within a battery). Then put it an environment of 90 °C for one hour or 120 °C for one hour.

The modified alginate dressing and polyolefin separator were soaked in the electrolyte of 1mol/L LiPF<sub>6</sub> in DEC-EC-DMC (volume ratio 1:1:1) for adsorption and retention tests. After 10 minutes, excess electrolyte on the membrane surface was scraped by a coating scraper, then was weighed after naturally drying for 0, 30, 60, and 90 min in a sealed box. Adsorption ratio (AR) and retention ratio (RR) were calculated using the following formula:

$$AR\% = [(W_a - W_0)/W_0] * 100\%$$

$$RR\% = [(W_r - W_0)/W_0] * 100\%$$

Where  $W_a$  is separator weight after fully adsorbing electrolyte,  $W_0$  is original weight (before immersed in electrolyte), and  $W_r$  is the weight of adsorbed separator after drying a certain time.

### **Tests for electrochemical performances**

All electrochemical performances were tested within CR2025 coin cell, which assembled in argon-filled glove box. 1 mol/L LiPF<sub>6</sub> solution in a mixture solvent of EC/DMC/EMC (1:1:1 in volume ratio) was used as the electrolyte. Cathodes electrode consisted of LiNi<sub>1/3</sub>Co<sub>1/3</sub>Mn<sub>1/3</sub>O<sub>2</sub> (70 wt.%), acetylene black (20 wt.%) and binder (polyvinylidene fluoride, 10 wt.%). Area mass loading of active materials was about 3 mg cm<sup>-2</sup>. Lithium metal foil was used as anode. Galvanostatic charge/discharge curves were scanned on battery testing system (Land CT2001A battery tester, Wuhan Jinnuo Electronics Co. Ltd., China) with electrochemical window of 2.8 - 4.3 V.

**Figure S1**

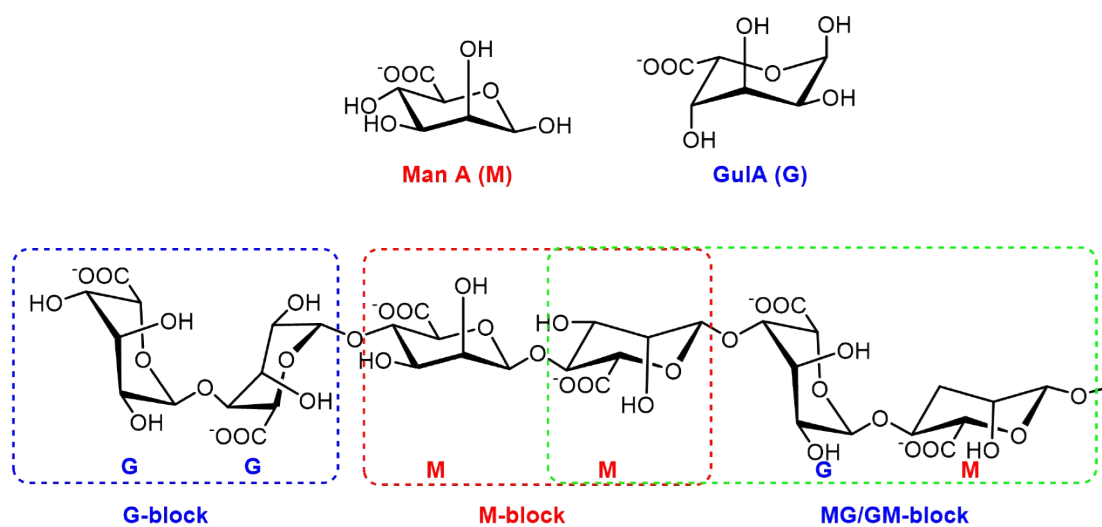

Fig S1 Chemical structure of alginate. The alginate monomers  $\beta$ -D-mannuronic acid (ManA; M) and  $\alpha$ -L-guluronic acid (GulA; G) (From reference [2])

**Figure S2**

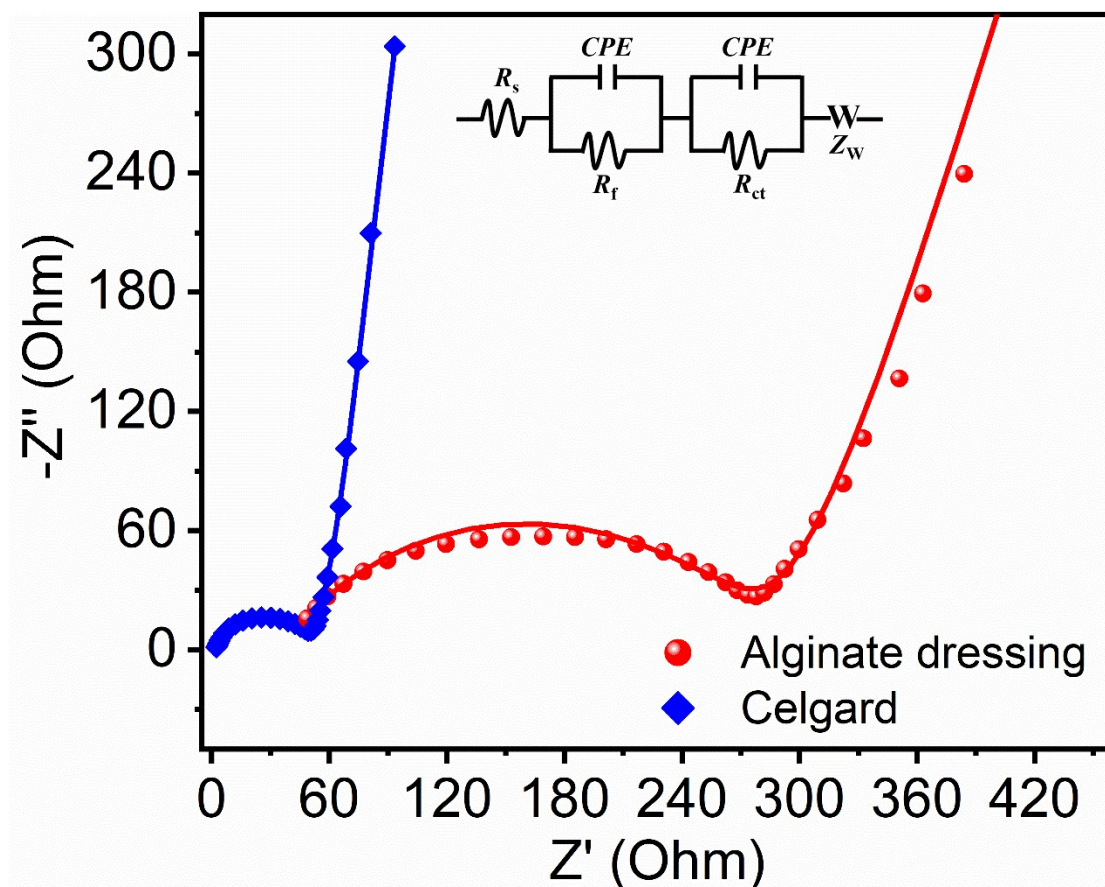

Fig S2 Nyquist plots and corresponding equivalent circuits of the half Li-ion batteries based on the separator of Alginate dressing and Polyolefin membrane

In the high-frequency region, the intercepts on the real axis are 48.89 and 2.52  $\Omega$ , respectively. According to reference [3], the calculated corresponding Li-ion conductivities of the cells are 7.24 and 8.78  $\text{mS cm}^{-1}$  based on the thickness of alginate dressing ( $\sim 400 \mu\text{m}$ ) and Polyolefin membrane ( $\sim 25 \mu\text{m}$ ) according to the equation in reference [4].

## Table S1

Table S1 Fitting results of resistance based on equivalent circuits inserted  
in Figure S2

| sample | $R_s$ ( $\Omega$ ) | $R_f$ ( $\Omega$ ) | $R_{ct}$ ( $\Omega$ ) |
|--------|--------------------|--------------------|-----------------------|
| 1      | 1.958              | 45.7               | 9460                  |
| 2      | 34.05              | 244.9              | 7479                  |

## Reference

- [1] PRODUCT DESCRIPTION for Alginate Dressing (Biatain Alginate 3710).  
<https://www.woundcareshop.com/BiatainAlginate3710Single.aspx>
- [2] G.A. Martau, M. Mihai, D.C. Vodnar, The Use of Chitosan, Alginate, and Pectin in the Biomedical and Food Sector—Biocompatibility, Bioadhesiveness, and Biodegradability, *Polymers*, **2019**, 11, 1837
- [3] B. Li, Y. Li, D. Dai, K. Chang, H. Tang, Z. Chang, C. Wang, X. Yuan, and H. Wang, Facile and Nonradiation Pretreated Membrane as a High Conductive Separator for Li-Ion Batteries, *ACS Appl. Mater. Interfaces*, **2015**, 7, 20184
- [4] M. Yanilmaz, Y. Lu, M. Dirican, K. Fu, X. W. Zhang, Nanoparticle-on-Nanofiber Hybrid Membrane Separators for Lithium-Ion Batteries via Combining Electrospraying and Electrospinning Techniques. *J. Membr. Sci.* **2014**, 456, 57
